# Supplementary material for: A quest for the biological sources of the ubiquitous long chain alkyl diols in the marine realm
Source: Copernicus journal article supplement (doi:10.5194/bg-2018-97), 2018-03-28
Supplement: Supplementary file 1 [file bg-2018-97-supplement.zip]

**Supplementary Table S1.** List of species known to contain 1,x diols to date

| Species or family            | Class or division      | Chain length | Functionalisation position | Reference                                        |
|------------------------------|------------------------|--------------|----------------------------|--------------------------------------------------|
| <i>Apedinella radians</i>    | Dicthyochophyceae      | 28-32        | 1,14                       | Rampen et al. 2011                               |
| <i>Heterosigma akashiwo</i>  | Raphidophyceae         | 30           | 1,13                       | Rampen unpublished                               |
| <i>Haramonas dimorpha</i>    | Raphidophyceae         | 28-30        | 1,13                       | Rampen unpublished                               |
| <i>Sarcinochrysis marina</i> | Pelagophyceae          | 26-28        | 1,13                       | Rampen unpublished                               |
| <i>Phaeomonas parva</i>      | Pinguiphyceae          | 24-26        | 1,13                       | Rampen unpublished                               |
| <i>Chrysosphaera parvula</i> | Chrysophyceae          | 32           | 1,15                       | Rampen unpublished                               |
| Monopsidaceae                | Eustigmatophyceae      | 28-32        | 1,13; 1,15; 1,17           | Rampen et al. 2014, Volkman et al. 1992          |
| Eustogmataceae               | Eustigmatophyceae      | 28-34        | 1,13; 1,15                 | Rampen et al. 2014, Volkman et al. 1999          |
| Goniochloridaceae            | Eustigmatophyceae      | 28-32        | 1,13; 1,14; 1,15           | Rampen et al. 2014                               |
| <i>Florenciella parvula</i>  | Dictyochophyceae       | 24           | 1,13; 1,14; 1,15           | Rampen unpublished                               |
| <i>Proboscia alata</i>       | Bacillariophyceae      | 28-32        | 1,14                       | Sinninghe Damsté et al. 2003, Rampen et al. 2009 |
| <i>Proboscia indica</i>      | Radial Centric Diatoms | 28-32        | 1,14                       | Sinninghe Damsté et al. 2003, Rampen et al. 2009 |
| <i>Proboscia inermis</i>     | Radial Centric Diatoms | 28-30        | 1,14                       | Rampen et al. 2007                               |
| <i>Azolla filliculoides</i>  | Pteridophyta           | 30-36        | 1,11 ;1,13 ;1,15 ; 1,17    | Speelman et al. 2009                             |
| <i>Azolla imbricata</i>      | Pteridophyta           | 30-34        | 1,11; 1,13; 1,15           | Mao et al. 2017                                  |
| <i>Osmunda regalis</i>       | Pteridophyta           | 28-32        | 1,11                       | Jetter and Riderer 1999                          |
| <i>Funaria hygrometrica</i>  | Briophyta              | 32           | 1,7                        | Busta et al. 2016                                |
| <i>Papaver alpinum</i>       | Magnoliophyta          | 22-30        | 1,7; 1,9; 1,11             | Jetter et al. 1996                               |
| <i>Taxus baccata</i>         | Pinophyta              | 28-38        | 1,5                        | Wen and Jetter 2007                              |
| <i>Triticum aestivum</i>     | Magnoliophyta          | 26-28        | 1,17;1,19;1,21             | Racovita and Jetter 2016                         |
