# Supplementary material for: A quest for the biological sources of the ubiquitous long chain alkyl diols in the marine realm
Source: Copernicus journal article supplement (doi:10.5194/bg-2018-97), 2018-03-28
Supplement: Supplementary file 2 [file bg-2018-97-supplement.zip]

Supplementary Table S2. HCC sample locations, main physical, chemical and biological properties of the seawater sampled and number of 18S rRNA gene reads recovered from each sample

| SampleID  | Station | Depth<br>(m) | Description <sup>a</sup> | Latitude<br>(°N) | Longitude<br>(°E) | δ <sup>13</sup> C<br>d13C | Phosphate<br>μM | Ammonium<br>μM | Nitrite<br>μM | Nitrate<br>μM | Silica<br>μM | Pyrosequencing reads |               | No of OTUs (95 %) |               |
|-----------|---------|--------------|--------------------------|------------------|-------------------|---------------------------|-----------------|----------------|---------------|---------------|--------------|----------------------|---------------|-------------------|---------------|
|           |         |              |                          |                  |                   |                           |                 |                |               |               |              | Total                | LCD-producers | Total             | LCD-producers |
| HCC0-5    | 0       | 5            | Surface                  | 15.54            | -28.95            | -21.25                    | NA              | NA             | NA            | NA            | NA           | 1160                 | 0             | 150               | 0             |
| HCC0-60   | 0       | 60           | DCM                      | 15.54            | -28.95            | -21.63                    | NA              | NA             | NA            | NA            | NA           | 1652                 | 2             | 235               | 1             |
| HCC1-5    | 1       | 5            | Surface                  | 15.02            | -30.56            | -20.43                    | 0.01            | 0.195          | 0.009         | 0.05          | 0.92         | 4912                 | 0             | 362               | 0             |
| HCC1-40   | 1       | 40           | BWML                     | 15.02            | -30.56            | -19.72                    | 0.01            | 0.073          | 0.004         | 0.02          | 0.91         | 1871                 | 0             | 368               | 0             |
| HCC1-80   | 1       | 80           | DCM                      | 15.02            | -30.56            | -23.49                    | 0.2             | 0.055          | 0.043         | 0.81          | 1.75         | 2352                 | 2             | 270               | 1             |
| HCC2-5    | 2       | 5            | Surface                  | 14.35            | -32.58            | -20.27                    | 0               | 0.106          | 0.003         | 0.03          | 0.72         | 2259                 | 0             | 304               | 0             |
| HCC2-33   | 2       | 33           | BWML                     | 14.35            | -32.58            | -19.73                    | 0.01            | 0.095          | 0.01          | 0.02          | 0.72         | 1875                 | 0             | 361               | 0             |
| HCC2-65   | 2       | 65           | DCM                      | 14.35            | -32.58            | -21.71                    | 0.23            | 0.098          | 0.034         | 0.99          | 1.88         | 1818                 | 0             | 323               | 0             |
| HCC3-5    | 3       | 5            | Surface                  | 13.16            | -36.21            | -20.33                    | 0               | 0.058          | 0             | 0             | 0.79         | 3154                 | 27            | 483               | 3             |
| HCC3-35   | 3       | 35           | BWML                     | 13.16            | -36.21            | -20.14                    | 0               | 0.05           | 0             | 0             | 0.73         | 2349                 | 0             | 452               | 0             |
| HCC3-90   | 3       | 90           | DCM                      | 13.16            | -36.21            | -23.9                     | 0.36            | 0.059          | 0.139         | 5.63          | 1.77         | 2722                 | 6             | 313               | 1             |
| HCC4-5    | 4       | 5            | Surface                  | 12.41            | -38.50            | -20.26                    | 0               | 0.089          | 0             | 0.01          | 0.96         | 4662                 | 1             | 442               | 1             |
| HCC4-30   | 4       | 30           | BWML                     | 12.41            | -38.50            | -20.24                    | 0.01            | 0.067          | 0             | 0.01          | 0.89         | 5295                 | 0             | 465               | 0             |
| HCC4-83   | 4       | 83           | DCM                      | 12.41            | -38.50            | -23.95                    | 0.04            | 0.109          | 0             | 0.01          | 1.22         | 3207                 | 1             | 399               | 1             |
| HCC5-5    | 5       | 5            | Surface                  | 10.83            | -40.47            | -20.97                    | 0.02            | 0.05           | 0             | 0.01          | 0.91         | 1597                 | 3             | 250               | 2             |
| HCC5-40   | 5       | 40           | BWML                     | 10.83            | -40.47            | -19.98                    | 0.03            | 0.05           | 0.001         | 0.01          | 1.02         | 4639                 | 0             | 507               | 0             |
| HCC5-80   | 5       | 80           | DCM                      | 10.83            | -40.47            | -24.09                    | 0.53            | 0.066          | 0.318         | 7.87          | 3            | 3742                 | 2             | 549               | 1             |
| HCC6-15   | 6       | 15           | BWML                     | 9.41             | -42.10            | -21.44                    | 0               | 0.05           | 0             | 0.01          | 0.89         | 4306                 | 0             | 395               | 0             |
| HCC6-90   | 6       | 90           | DCM                      | 9.41             | -42.10            | -23.78                    | 0.52            | 0.069          | 0.274         | 8.75          | 2.92         | 6404                 | 3             | 520               | 2             |
| HCC7-15   | 7       | 15           | BWML                     | 7.52             | -44.28            | -20.46                    | 0.01            | 0.05           | 0             | 0.01          | 5.66         | 3918                 | 0             | 416               | 0             |
| HCC7-60   | 7       | 60           | DCM                      | 7.52             | -44.28            | -21.09                    | 0.05            | 0.057          | 0.163         | -0.01         | 1.05         | 4821                 | 0             | 483               | 0             |
| HCC8-10   | 8       | 10           | BWML                     | 6.49             | -45.45            | -19.56                    | 0.01            | 0.055          | 0.001         | 0.01          | 10.12        | 4963                 | 1             | 450               | 1             |
| HCC8-52   | 8       | 52           | DCM                      | 6.49             | -45.45            | -22.83                    | 0.02            | 0.074          | 0.019         | 0             | 1.36         | 2581                 | 0             | 398               | 0             |
| HCC9-5    | 9       | 5            | Surface                  | 5.60             | -46.40            | -21.39                    | 0.02            | 0.208          | 0             | 0.01          | 11.88        | 4910                 | 0             | 516               | 0             |
| HCC9-40   | 9       | 40           | DCM                      | 5.60             | -46.40            | -22.98                    | 0.09            | 0.069          | 0.458         | 0.1           | 2.89         | 1818                 | 0             | 258               | 0             |
| HCC10-5   | 10      | 5            | Surface                  | 6.68             | -47.49            | -20.38                    | 0.01            | 0.064          | 0             | 0.01          | 13.64        | 1749                 | 1             | 310               | 1             |
| HCC10-9   | 10      | 9            | BWML                     | 6.68             | -47.49            | -17.78                    | 0.01            | 0.053          | 0             | 0.01          | 13.24        | 2216                 | 1             | 329               | 1             |
| HCC10-50  | 10      | 50           | DCM                      | 6.68             | -47.49            | -21.12                    | 0.02            | 0.066          | 0.007         | 0             | 1.26         | 3983                 | 0             | 312               | 0             |
| HCC11-5   | 11      | 5            | Surface                  | 5.53             | -51.49            | -19.32                    | 0.07            | 0.062          | 0.003         | 0.01          | 18.34        | 2400                 | 0             | 374               | 0             |
| HCC11-15  | 11      | 15           | BWML                     | 5.53             | -51.49            | -20.65                    | 0.06            | 0.055          | 0.088         | 0.07          | 1.87         | 6340                 | 0             | 367               | 0             |
| HCC12-5   | 12      | 5            | Surface                  | 6.07             | -52.46            | -20.81                    | 0.09            | 0.105          | 0.003         | 0.01          | 3.14         | 4094                 | 0             | 322               | 0             |
| HCC12-15  | 12      | 15           | BWML                     | 6.07             | -52.46            | -19.62                    | 0.09            | 0.087          | 0.012         | 0             | 2.94         | 1469                 | 22            | 274               | 4             |
| HCC13-3   | 13      | 3            | Surface                  | 7.60             | -53.02            | -20.22                    | 0.01            | 0.111          | 0             | 0.01          | 10.43        | 2633                 | 10            | 198               | 2             |
| HCC13-35  | 13      | 35           | DCM                      | 7.60             | -53.02            | -20.89                    | 0.08            | 0.085          | 0.004         | 0.01          | 2.97         | 3614                 | 0             | 245               | 0             |
| HCC14-5   | 14      | 5            | Surface                  | 9.53             | -51.32            | -19.52                    | 0.01            | 0.051          | 0.001         | 0.01          | 11.77        | 3772                 | 6             | 280               | 2             |
| HCC14-60  | 14      | 60           | DCM                      | 9.53             | -51.32            | -19.81                    | 0.03            | 0.078          | 0.037         | 0             | 1.12         | 4812                 | 4             | 524               | 2             |
| HCC15-5   | 15      | 5            | Surface                  | 8.95             | -49.98            | -20.26                    | 0.04            | 0.05           | 0             | 0.01          | 8.99         | 3074                 | 7             | 336               | 1             |
| HCC15-11  | 15      | 11           | BWML                     | 8.95             | -49.98            | -19.74                    | 0.04            | 0.05           | 0.001         | 0.01          | 8.82         | 2238                 | 6             | 224               | 1             |
| HCC15-45  | 15      | 45           | DCM                      | 8.95             | -49.98            | -22.29                    | 0.01            | 0.087          | 0.039         | 0             | 1.23         | 3453                 | 0             | 409               | 0             |
| HCC16-5   | 16      | 5            | Surface                  | 10.22            | -51.88            | -20.55                    | 0.02            | 0.063          | 0             | 0.01          | 5.8          | 1647                 | 0             | 280               | 0             |
| HCC16-22  | 16      | 22           | BWML                     | 10.22            | -51.88            | -19.43                    | 0.03            | 0.051          | 0             | 0.01          | 3.94         | 1638                 | 0             | 287               | 0             |
| HCC16-77  | 16      | 77           | DCM                      | 10.22            | -51.88            | -23.21                    | 0.15            | 0.05           | 0.056         | 2.05          | 1.52         | 4081                 | 0             | 462               | 0             |
| HCC17-3   | 17      | 3            | Surface                  | 9.90             | -53.27            | -20.31                    | 0.01            | 0.05           | 0             | 0.01          | 13.75        | 1818                 | 0             | 300               | 0             |
| HCC17-10  | 17      | 10           | BWML                     | 9.90             | -53.27            | -19.38                    | 0.01            | 0.05           | 0             | 0.01          | 9.85         | 4079                 | 0             | 451               | 0             |
| HCC17-45  | 17      | 45           | DCM                      | 9.90             | -53.27            | -21.96                    | 0.11            | 0.05           | 0.007         | 0             | 2.7          | 2044                 | 2             | 282               | 1             |
| HCC18-5   | 18      | 5            | Surface                  | 9.37             | -55.20            | -20.21                    | 0.02            | 0.065          | 0.001         | 0.01          | 7.41         | 4486                 | 4             | 445               | 1             |
| HCC18-13  | 18      | 13           | BWML                     | 9.37             | -55.20            | -19.71                    | 0.03            | 0.07           | 0.001         | 0.01          | 6.42         | 4471                 | 2             | 323               | 1             |
| HCC18-66  | 18      | 66           | DCM                      | 9.37             | -55.20            | -21.82                    | 0.16            | 0.082          | 0.1           | 1.77          | 1.92         | 1876                 | 14            | 308               | 3             |
| HCC19-4   | 19      | 4            | Surface                  | 10.52            | -55.48            | -20.35                    | 0.03            | 0.096          | 0             | 0.01          | 7.03         | 2939                 | 0             | 245               | 0             |
| HCC19-12  | 19      | 12           | BWML                     | 10.52            | -55.48            | -19.9                     | 0.03            | 0.076          | 0             | 0.01          | 6.28         | 2903                 | 2             | 309               | 1             |
| HCC19-60  | 19      | 60           | DCM                      | 10.52            | -55.48            | -22.43                    | 0.05            | 0.081          | 0.026         | 0.05          | 1.45         | 5640                 | 1             | 446               | 1             |
| HCC20a-5  | 20a     | 5            | Surface                  | 11.27            | -54.16            | -20.6                     | 0.05            | 0.063          | 0             | 0.01          | 7.45         | 5924                 | 0             | 389               | 0             |
| HCC20a-15 | 20a     | 15           | BWML                     | 11.27            | -54.16            | -19.72                    | 0.06            | 0.061          | 0             | 0.01          | 5.72         | 9172                 | 6             | 530               | 2             |
| HCC20a-65 | 20a     | 65           | DCM                      | 11.27            | -54.16            | -22.69                    | 0.02            | 0.059          | 0.001         | 0.01          | 1.17         | 1454                 | 5             | 262               | 1             |
| HCC20b-5  | 20b     | 5            | Surface                  | 11.47            | -54.21            | -20.33                    | 0.03            | 0.084          | 0             | 0.01          | 6.26         | 4303                 | 0             | 269               | 0             |
| HCC20b-15 | 20b     | 15           | BWML                     | 11.47            | -54.21            | -19.94                    | 0.01            | 0.062          | 0             | 0.01          | 3.5          | 4566                 | 2             | 312               | 1             |
| HCC20b-80 | 20b     | 80           | DCM                      | 11.47            | -54.21            | -21.45                    | 0               | 0.075          | 0.002         | 0.01          | 1.04         | 2507                 | 1             | 326               | 1             |
| HCC21a-5  | 21a     | 5            | Surface                  | 13.02            | -54.67            | -20.09                    | 0               | 0.065          | 0             | 0.01          | 4.36         | 2268                 | 0             | 322               | 0             |
| HCC21a-15 | 21a     | 15           | BWML                     | 13.02            | -54.67            | -19.38                    | 0               | 0.054          | 0             | 0.01          | 2.3          | 3551                 | 1             | 331               | 1             |
| HCC21a-95 | 21a     | 95           | DCM                      | 13.02            | -54.67            | -22.14                    | 0.04            | 0.052          | 0.116         | 0.66          | 1.15         | 4009                 | 0             | 407               | 0             |
| HCC21b-15 | 21b     | 15           | BWML                     | 13.20            | -54.72            | -19.63                    | 0.01            | 0.067          | 0             | 0.01          | 1.78         | 3024                 | 2             | 286               | 1             |
| HCC21b-95 | 21b     | 95           | DCM                      | 13.20            | -54.72            | -22.8                     | 0.01            | 0.073          | 0.012         | 0.01          | 1            | 4446                 | 0             | 417               | 0             |
| HCC22-5   | 22      | 5            | Surface                  | 14.80            | -55.18            | -19.7                     | 0.01            | 0.089          | 0.001         | 0.01          | 1.86         | 4174                 | 2             | 503               | 2             |
| HCC22-35  | 22      | 35           | BWML                     | 14.80            | -55.18            | -20.04                    | 0.01            | 0.076          | 0             | 0.01          | 1.84         | 1371                 | 0             | 262               | 0             |
| HCC22-105 | 22      | 105          | DCM                      | 14.80            | -55.18            | -21.78                    | 0.02            | 0.084          | 0.049         | 0.04          | 0.9          | 5253                 | 1             | 406               | 1             |
| HCC23-5   | 23      | 5            | Surface                  | 15.79            | -57.05            | -19.67                    | 0               | 0.056          | 0             | 0.016         | 3.94         | 5737                 | 1             | 599               | 1             |
| HCC23-11  | 23      | 11           | BWML                     | 15.79            | -57.05            | -19.87                    | 0               | 0.05           | 0             | 0.01          | 3.9          | 2403                 | 1             | 360               | 1             |
| HCC23-95  | 23      | 95           | DCM                      | 15.79            | -57.05            | -21.59                    | 0.01            | 0.055          | 0.074         | 0.504         | 1.16         | 7946                 | 5             | 554               | 2             |

<sup>a</sup> Seawater layer where the samples were collected. BWML: Bottom Water Mixed Layer, DCM: Deep Chlorophyll Maximum

<sup>b</sup> Total Organic Carbon

<sup>c</sup> Photosynthetic picoeukaryotes

<sup>d</sup> Photosynthetic nanoeukaryotes
