# Supplementary material for: A quest for the biological sources of the ubiquitous long chain alkyl diols in the marine realm
Source: Copernicus journal article supplement (doi:10.5194/bg-2018-97), 2018-03-28
Supplement: Supplementary file 3 [file bg-2018-97-supplement.zip]

**Supplementary Table S3.** List of forward primer-associated Multiplex Identifiers (MIDs) used for Ion Torrent sequencing.

| Sample ID  | MID code | MID sequence | Sequencing run |
|------------|----------|--------------|----------------|
| HCC-12-5   | V4F_1    | ACGAGTGCGT   | I              |
| HCC-1-5    | V4F_2    | ACGCTCGACA   | I              |
| HCC-12-15  | V4F_3    | AGACGCACTC   | I              |
| HCC-20a-15 | V4F_4    | AGCACTGTAG   | I              |
| HCC-20a-65 | V4F_5    | ATCAGACACG   | I              |
| HCC-23-5   | V4F_6    | ATATCGCGAG   | I              |
| HCC-23-11  | V4F_7    | CGTGTCTCTA   | I              |
| HCC-23-95  | V4F_8    | CTCGCGTGTC   | I              |
| HCC-1-40   | V4F_9    | TAGTATCAGC   | I              |
| HCC-1-80   | V4F_10   | TCTCTATGCG   | I              |
| HCC-2-5    | V4F_11   | TGATACGTCT   | I              |
| HCC-20b-5  | V4F_1    | ACGAGTGCGT   | II             |
| HCC-20b-15 | V4F_2    | ACGCTCGACA   | II             |
| HCC-21a-5  | V4F_3    | AGACGCACTC   | II             |
| HCC-21a-15 | V4F_4    | AGCACTGTAG   | II             |
| HCC-21a-95 | V4F_5    | ATCAGACACG   | II             |
| HCC-21b-5  | V4F_6    | ATATCGCGAG   | II             |
| HCC-21b-15 | V4F_7    | CGTGTCTCTA   | II             |
| HCC-20a-5  | V4F_8    | CTCGCGTGTC   | II             |
| HCC-20b-80 | V4F_9    | TAGTATCAGC   | II             |
| HCC-21b-95 | V4F_10   | TCTCTATGCG   | II             |
| HCC-14-5   | V4F_11   | TGATACGTCT   | II             |
| HCC-14-60  | V4F_13   | TCGATCACGT   | II             |
| HCC-14-200 | V4F_14   | CGAGAGATAC   | II             |
| HCC-13-3   | V4F_15   | ATACGACGTA   | II             |
| HCC-13-35  | V4F_16   | TCACGTACTA   | II             |
| HCC-15-5   | V4F_17   | CGTCTAGTAC   | II             |
| HCC-15-11  | V4F_18   | TCTACGTAGC   | II             |
| HCC-15-45  | V4F_19   | TGTACTACTC   | II             |
| HCC-18-5   | V4F_20   | ACGACTACAG   | II             |
| HCC-18-13  | V4F_1    | ACGAGTGCGT   | III            |
| HCC-18-66  | V4F_2    | ACGCTCGACA   | III            |
| HCC-16-5   | V4F_3    | AGACGCACTC   | III            |
| HCC-16-22  | V4F_4    | AGCACTGTAG   | III            |
| HCC-16-77  | V4F_5    | ATCAGACACG   | III            |
| HCC-22-5   | V4F_6    | ATATCGCGAG   | III            |
| HCC-22-35  | V4F_7    | CGTGTCTCTA   | III            |
| HCC-22-105 | V4F_8    | CTCGCGTGTC   | III            |
| HCC-10-5   | V4F_9    | TAGTATCAGC   | III            |
| HCC-10-9   | V4F_10   | TCTCTATGCG   | III            |
| HCC-10-50  | V4F_11   | TGATACGTCT   | III            |
| HCC-10-200 | V4F_12   | TACTGAGCTA   | III            |
| HCC-17-3   | V4F_13   | TCGATCACGT   | III            |
| HCC-17-10  | V4F_14   | CGAGAGATAC   | III            |
| HCC-17-45  | V4F_15   | ATACGACGTA   | III            |
| HCC-2-65   | V4F_16   | TCACGTACTA   | III            |
| HCC-3-5    | V4F_17   | CGTCTAGTAC   | III            |
| HCC-3-35   | V4F_18   | TCTACGTAGC   | III            |
| HCC-3-90   | V4F_19   | TGTACTACTC   | III            |
| HCC-6-5    | V4F_20   | ACGACTACAG   | III            |
| HCC-6-15   | V4F_1    | ACGAGTGCGT   | IV             |
| HCC-6-90   | V4F_2    | ACGCTCGACA   | IV             |
| HCC-7-5    | V4F_3    | AGACGCACTC   | IV             |
| HCC-7-15   | V4F_4    | AGCACTGTAG   | IV             |
| HCC-7-60   | V4F_5    | ATCAGACACG   | IV             |
| HCC-9-5    | V4F_6    | ATATCGCGAG   | IV             |
| HCC-9-40   | V4F_7    | CGTGTCTCTA   | IV             |
| HCC-9-200  | V4F_8    | CTCGCGTGTC   | IV             |
| HCC-0-5    | V4F_9    | TAGTATCAGC   | IV             |
| HCC-0-60   | V4F_10   | TCTCTATGCG   | IV             |
| HCC-11-5   | V4F_11   | TGATACGTCT   | IV             |
| HCC-11-15  | V4F_12   | TACTGAGCTA   | IV             |
| HCC-19-4   | V4F_13   | TCGATCACGT   | IV             |
| HCC-19-12  | V4F_14   | CGAGAGATAC   | IV             |
| HCC-19-60  | V4F_15   | ATACGACGTA   | IV             |
| HCC-4-5    | V4F_16   | TCACGTACTA   | IV             |
| HCC-4-30   | V4F_17   | CGTCTAGTAC   | IV             |
| HCC-4-83   | V4F_18   | TCTACGTAGC   | IV             |
| HCC-5-5    | V4F_19   | TGTACTACTC   | IV             |
| HCC-5-40   | V4F_20   | ACGACTACAG   | IV             |
| HCC-5-80   | V4F_1    | ACGAGTGCGT   | V              |
| HCC-8-10   | V4F_2    | ACGCTCGACA   | V              |
| HCC-8-5    | V4F_3    | AGACGCACTC   | V              |
| HCC-8-52   | V4F_4    | AGCACTGTAG   | V              |
| HCC-2-33   | V4F_5    | ATCAGACACG   | V              |
| HCC-15-5   | V4F_6    | ATATCGCGAG   | V              |
| HCC-12-15  | V4F_7    | CGTGTCTCTA   | V              |
| HCC-23-5   | V4F_8    | CTCGCGTGTC   | V              |
| HCC-1-40   | V4F_9    | TAGTATCAGC   | V              |
| HCC-21a-5  | V4F_10   | TCTCTATGCG   | V              |
| HCC-14-60  | V4F_11   | TGATACGTCT   | V              |
| HCC-18-5   | V4F_12   | TACTGAGCTA   | V              |
| HCC-16-5   | V4F_13   | TCGATCACGT   | V              |
| HCC-22-5   | V4F_15   | ATACGACGTA   | V              |
| HCC-16-77  | V4F_16   | TCACGTACTA   | V              |
| HCC-17-10  | V4F_17   | CGTCTAGTAC   | V              |
| HCC-7-5    | V4F_18   | TCTACGTAGC   | V              |
| HCC-9-5    | V4F_19   | TGTACTACTC   | V              |
| HCC-11-5   | V4F_20   | ACGACTACAG   | V              |
